# Supplementary material for: VGLL4 and MENIN function as TEAD1 corepressors to block pancreatic β cell proliferation
Source: PubMed Central journal article supplement — Cell Rep. Author manuscript; Available in PMC 2023 Feb 27. (PMC9970006; doi:10.1016/j.celrep.2022.111904), 2023-01-19
Supplement: NIHMS1870500-supplement-2.pdf [file NIHMS1870500-supplement-2.pdf]

**Supplementary Table S1. Related to STAR Methods. Primers for RT-PCR**

| Genes              | Forward primers 5' to 3' | Reversed primers 5' to 3' |
|--------------------|--------------------------|---------------------------|
| Mouse <i>TAZ</i>   | TAAGGGTGGGAGTTTGCTTC     | CCGAGGACGGATTCATCTTTAT    |
| Mouse <i>TEAD1</i> | AGAAAGGTGGCTTGAAGGAG     | CGGCGTCGTCTGGATATT        |
| Mouse <i>CCN2</i>  | AAGACACATTTGGCCAGAC      | GACAGGCTTGGCGATTTTAG      |
| Mouse <i>VGLL4</i> | TCGGCGTTCTGTGCTATGAA     | GATGCGGCTCATCTTGGAGA      |
| Mouse <i>Menin</i> | CCTCGGACATCTGGAAAGATAC   | AGGTCTTAGCTGAGGCAATTC     |
| Mouse <i>SMAD4</i> | TTGTGACTGTGGATGGCTATG    | CTGCACTCCTTTGCCTATGT      |
| RAT <i>INS1</i>    | ACAGCACCTTTGTGGTCCTC     | GTGCAGCACTGATCCACAAT      |
| RAT <i>MAFA</i>    | AGCAAGGAGGAGGTCATC       | CGTATTTCTCCTTGTACAGG      |
| RAT <i>GLUT2</i>   | CCTCTGCTTCCAGTACATTGCG   | AGGGTGAAGACCAGGACCAC      |
| RAT <i>NEUROD1</i> | CCCATGCCGAATTATTTTGT     | AAGTGCTAAGGCAACGCAAT      |
| RAT <i>NKX6.1</i>  | ATGGGAAGAGAAAACACACCAGAC | TAATCGTCGTCGTCCTCCTCGTTC  |
| RAT <i>PDX1</i>    | AGCTCACGCGTGGAAAAG       | GTACGGGTCCTTATTCTCCTC     |
| Mouse <i>FZD7</i>  | CCTTGTTTCGTCTACCTCTTCATC | CTTCTCCAGCTTCTCTGTCTTG    |
| Human <i>TEAD1</i> | GACCCAGACTCGTACAACAAA    | TCTGACGAATGTCCACTGATTC    |
| Human <i>VGLL4</i> | TGAAGATGGACCTGTTGAACTATC | AGGGTCTGTATTCTGGGTTCT     |
| RAT <i>FOXA2</i>   | CCCTGGGACTTAACTGTAAC     | GCTCATGTAAGTGTTTCATGC     |
| RAT <i>CCN2</i>    | AAGACACATTTGGCCCTGAC     | CTTGACAGGCTTGGCAATTT      |
